# Supplementary material
Source: Springer Nature journal article supplement (https://www.springermedizin.de/resource/supplementary/12985_2010_948_MOESM1_ESM.pdf/9608804)
Supplement: MOESM1 [file 9608804]

Some of 663 anti-HCV positive sera samples of Patients with chronic HCV were tested by HCV Qualitative PCR

140 sera were excluded from the study because they were negative by HCV RNA PCR

523 sera were tested by Real-time PCR for HCV RNA quantification

108 sera were excluded from the study due to low viral load (<500 IU/ml)

415 sera were tested by genotyping method for the determination of frequency distribution

136 of the genotyped patients belonged to Abbottabad

58 of the genotyped patients belonged to Bannu

80 of the genotyped patients belonged to Kohat

51 of the genotyped patients belonged to Mardan

36 of the genotyped patients belonged to Peshawar

32 of the genotyped patients belonged to Swat

6 of the genotyped patients belonged to Hari pur

7 of the genotyped patients belonged to Swabi

9 of the genotyped patients belonged to D.I.Khan
